# Supplementary material for: Quantifying the Underestimation of Relative Risks from Genome-Wide Association Studies
Source: PLOS journal article supplement (doi:10.1371/journal.pgen.1001337), 2011-03-17
Supplement: S7 (10.1371/journal.pgen.1001337.s007) [file journal.pgen.1001337.s007]

|  |  | Probability RR greater than | | |
| --- | --- | --- | --- | --- |
| RAF | Standard Deviation of log(RR) | 1.3 | 1.5 | 2.5 |
| 0-0.05 | 1.21 | 0.83 | 0.74 | 0.45 |
| 0.05-0.1 | 0.84 | 0.76 | 0.63 | 0.28 |
| 0.1-0.15 | 0.61 | 0.67 | 0.51 | 0.13 |
| 0.15-0.2 | 0.46 | 0.57 | 0.38 | 0.05 |
| 0.2-0.25 | 0.36 | 0.47 | 0.27 | 0.01 |
| 0.25-0.3 | 0.3 | 0.38 | 0.17 | 0 |
| 0.3-0.35 | 0.25 | 0.3 | 0.11 | 0 |
| 0.35-0.4 | 0.23 | 0.24 | 0.07 | 0 |
| 0.4-0.45 | 0.21 | 0.21 | 0.05 | 0 |
| 0.45-0.5 | 0.2 | 0.19 | 0.04 | 0 |
| 0.5-0.55 | 0.2 | 0.19 | 0.04 | 0 |
| 0.55-0.6 | 0.21 | 0.21 | 0.05 | 0 |
| 0.6-0.65 | 0.23 | 0.24 | 0.07 | 0 |
| 0.65-0.7 | 0.25 | 0.3 | 0.11 | 0 |
| 0.7-0.75 | 0.3 | 0.38 | 0.17 | 0 |
| 0.75-0.8 | 0.36 | 0.47 | 0.27 | 0.01 |
| 0.8-0.85 | 0.46 | 0.57 | 0.38 | 0.05 |
| 0.85-0.9 | 0.61 | 0.67 | 0.51 | 0.13 |
| 0.9-0.95 | 0.84 | 0.76 | 0.63 | 0.28 |
| 0.95-1 | 1.21 | 0.83 | 0.74 | 0.45 |
