# Supplementary material for: Quantifying the Underestimation of Relative Risks from Genome-Wide Association Studies
Source: PLOS journal article supplement (doi:10.1371/journal.pgen.1001337), 2011-03-17
Supplement: S8 (10.1371/journal.pgen.1001337.s008) [file journal.pgen.1001337.s008]

| Gene | SNP | RAF | RR |
| --- | --- | --- | --- |
| KCNJ11 | rs5219 | 0.4 | 1.15 |
| PPARG | rs1801282 | 0.85 | 1.23 |
| TCF7L2 | rs7901695 | 0.4 | 1.37 |
| SLC30A8 | rs13266634 | 0.72 | 1.12 |
| WFS1 | rs10010131 | 0.6 | 1.11 |
| HHEX/IDE | rs5015480 | 0.63 | 1.13 |
| CDKAL1 | rs10946398 | 0.36 | 1.16 |
| CDKN2A/B | rs10811661 | 0.86 | 1.19 |
| FTO | rs8050136 | 0.45 | 1.23 |
| IGF2BP2 | rs4402960 | 0.35 | 1.11 |
| TCF2 | rs757210 | 0.43 | 1.08 |
| JAZF1 | rs864745 | 0.501 | 1.1 |
| CDC123/CAMK1D | rs12779790 | 0.18 | 1.11 |
| ADAMTS9 | rs4607103 | 0.76 | 1.09 |
| THADA | rs7578597 | 0.9 | 1.15 |
| NOTCH2 | rs10923931 | 0.106 | 1.13 |
| TSPAN8/LGR5 | rs79611581 | 0.269 | 1.09 |
| MC4R | rs17782313 | 0.24 | 1.09 |
