# Supplementary material for: Quantifying the Underestimation of Relative Risks from Genome-Wide Association Studies
Source: PLOS journal article supplement (doi:10.1371/journal.pgen.1001337), 2011-03-17
Supplement: S10 (10.1371/journal.pgen.1001337.s010) [file journal.pgen.1001337.s010]

| Gene | SNP | RAF | RR |
| --- | --- | --- | --- |
| FGFR2 | rs2981582 | 0.38 | 1.26 |
| TNRC9 | rs3803662 | 0.25 | 1.2 |
| MAP3K1 | rs889312 | 0.28 | 1.13 |
| LSP1 | rs3817198 | 0.3 | 1.07 |
| - | rs13281615 | 0.4 | 1.08 |
| - | rs13387042 | 0.5 | 1.2 |
| CASP8 | rs1053485 | 0.86 | 1.13 |
